# Supplementary material for: Pathogenic Bacteroides fragilis strains can emerge from gut-resident commensals
Source: PubMed Central journal article supplement — bioRxiv. 2024 Jun 19:2024.06.19.599758. Preprint. [Version 1] doi: 10.1101/2024.06.19.599758 (PMC11213024; doi:10.1101/2024.06.19.599758), 2024-06-19
Supplement: NIHPP2024.06.19.599758v1-supplement-1.pdf [file NIHPP2024.06.19.599758v1-supplement-1.pdf]

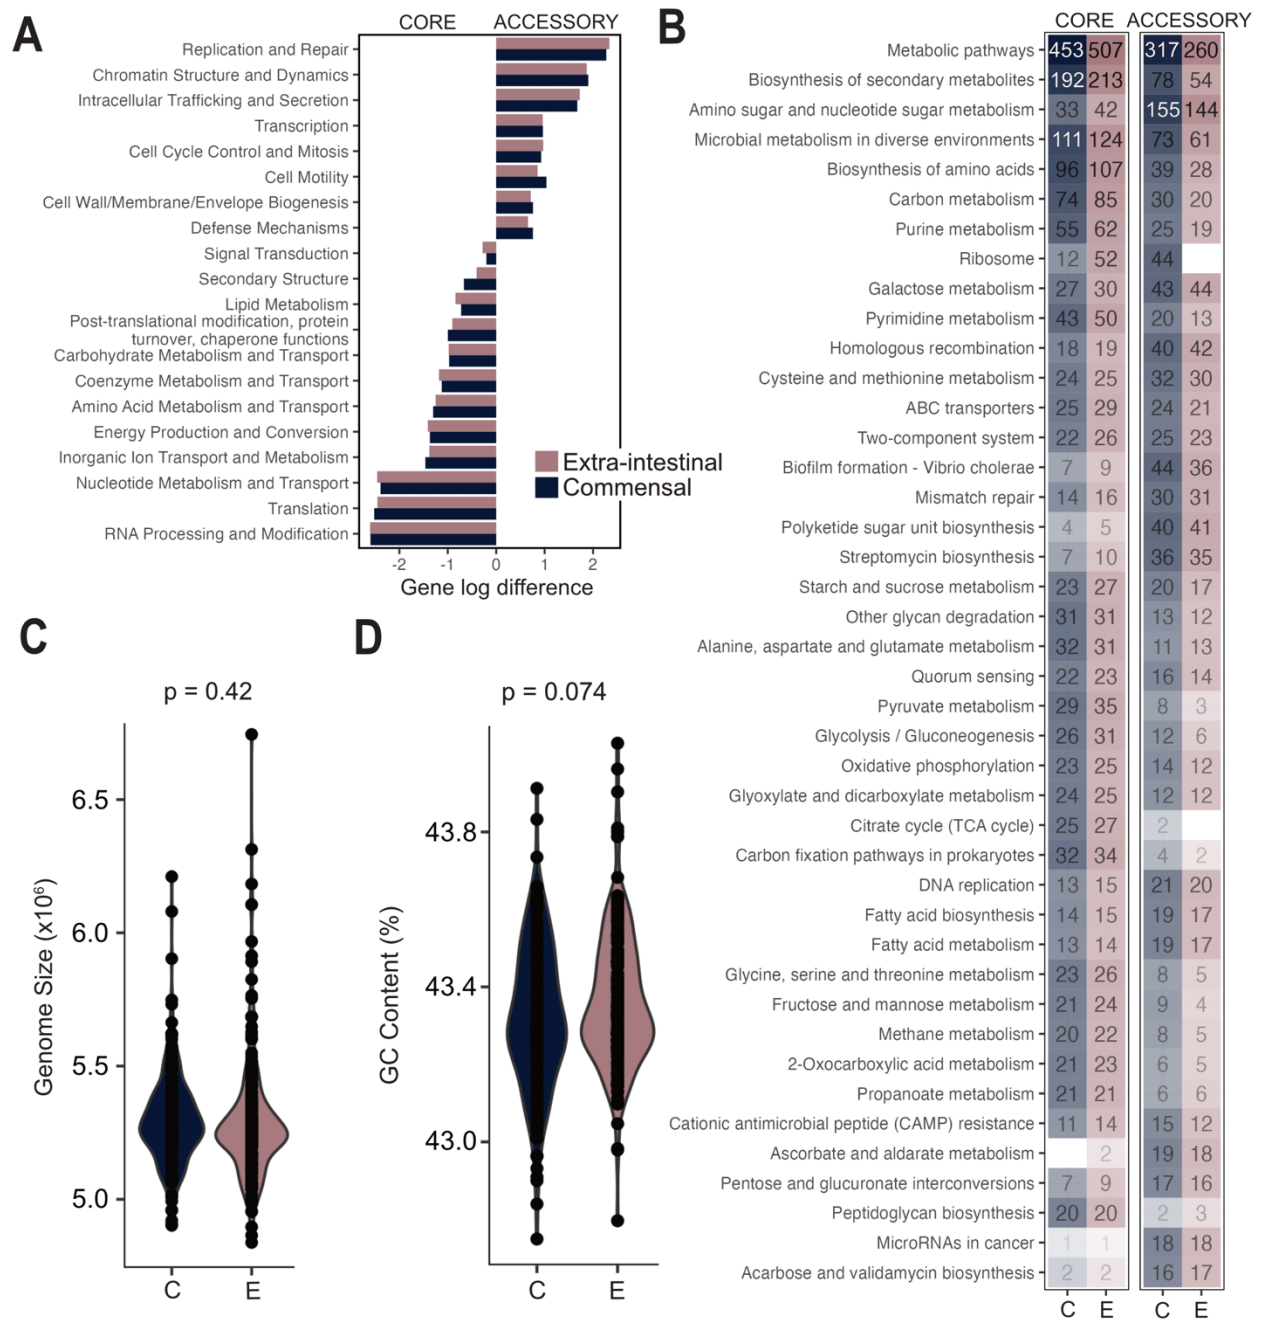

**Supplemental Figure 1. Genetic diversity among commensal and extra-intestinal *B. fragilis* isolates**

**A)** Bar graph of log<sub>2</sub> odds ratio between accessory and core genes per COG category separated by commensal (navy) versus extra-intestinal (pink) strains.

**B)** The top 30 core and top 30 accessory KEGG categories, ordered by most frequently observed KEGG KO category. C, commensal; E, extra-intestinal.

**C)** Genome size of commensal (C, n=281) and extra-intestinal (E, n=280) isolates, excluding assemblies derived from metagenomic assemblies, Welch's t-test, p=0.42.

**D)** GC content of commensal (C, n=281) and extra-intestinal (E, n=280) isolates, excluding assemblies derived from metagenomic assemblies, Welch's t-test, p=0.074.

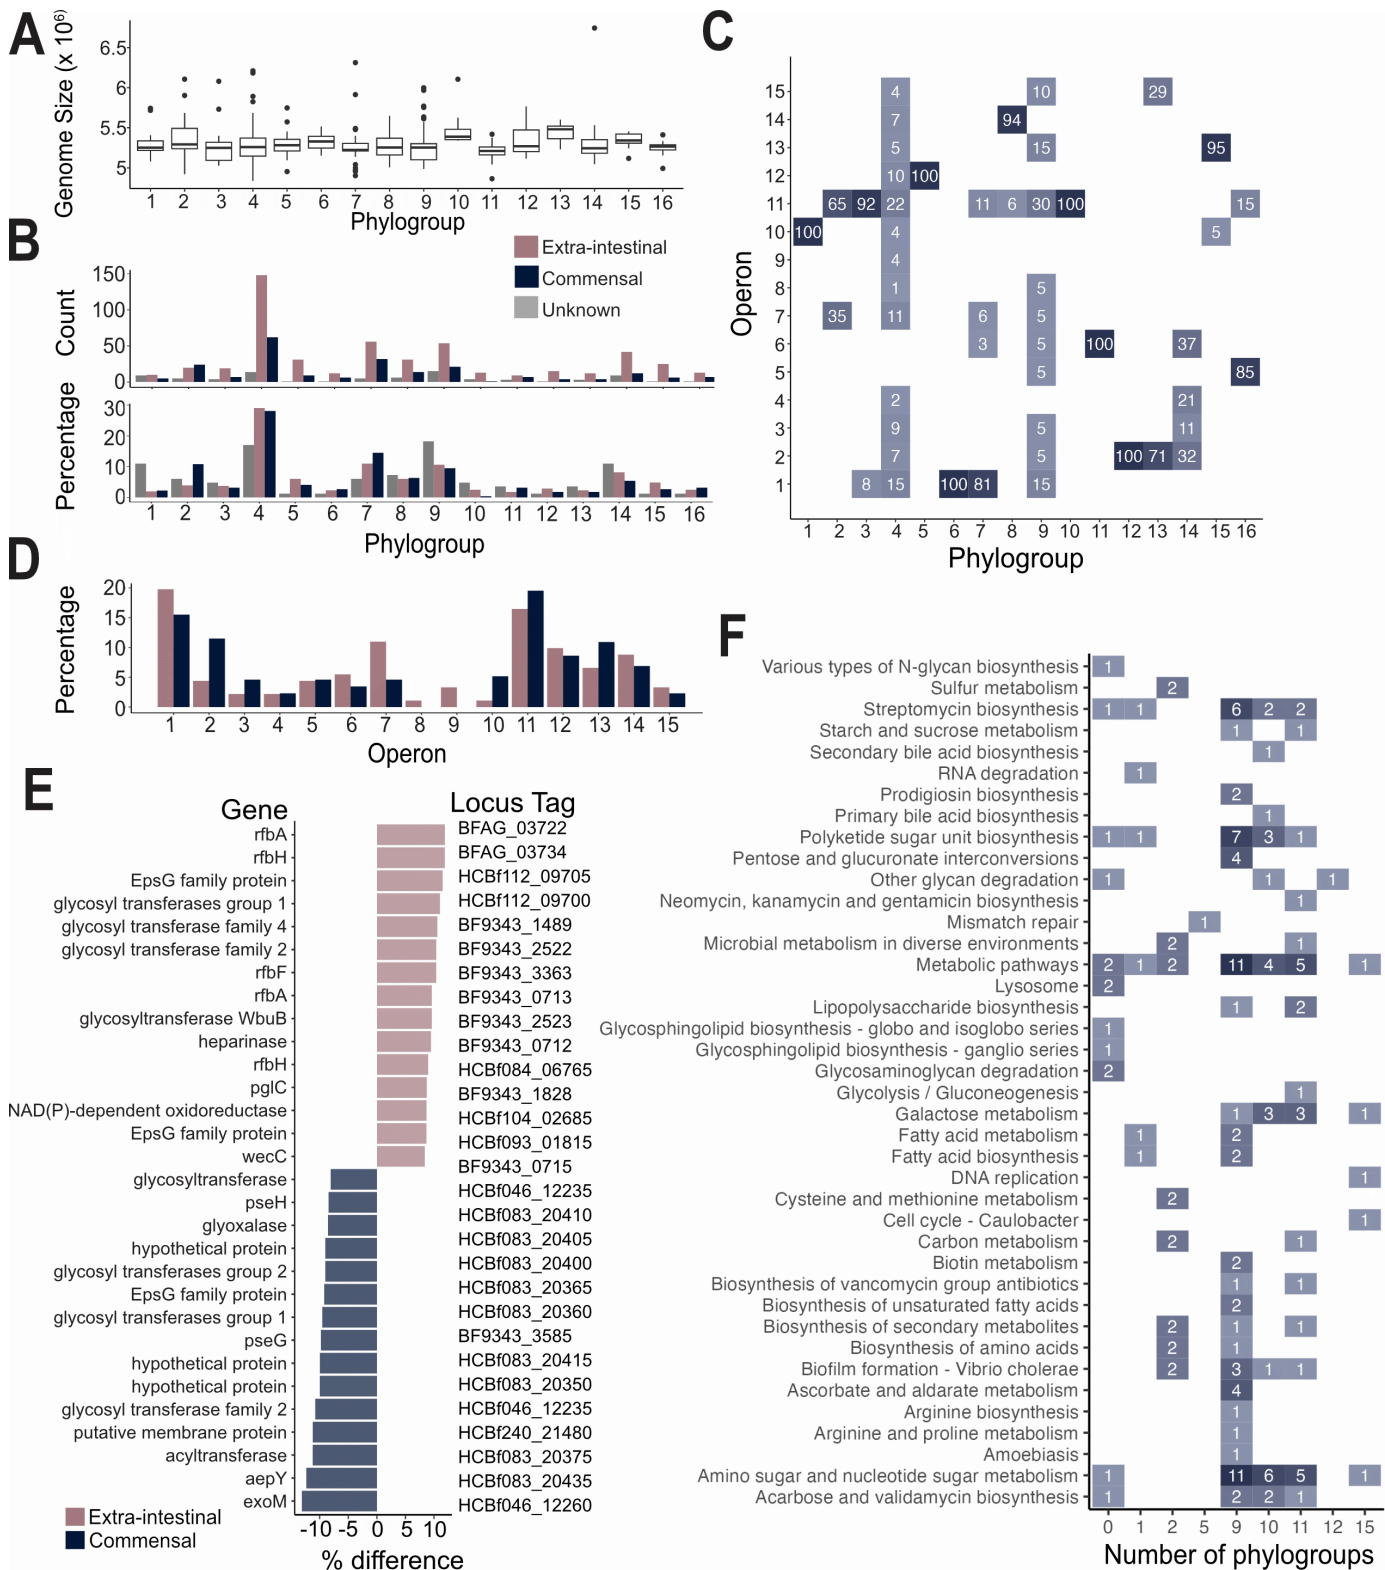

**Supplemental Figure 2. *B. fragilis* commensal and extra-intestinal strain distribution among phylogroups and niche specificity traits**

**A)** Genome size of phylogroups 1-16. No statistically significant phylogroups by Welch's t-test at a corrected p-value of 0.05.

- B)** Distribution of *B. fragilis* isolates by isolation source across phylogroups. No statistically significant difference between isolation sources per phylogroup after chi-squared test with correction for multiple hypothesis testing.
- C)** Distribution of phylogroups per PSA operon structure expressed in percentage.
- D)** Distribution of commensal versus extra-intestinal *B. fragilis* isolates across PSA operons.
- E)** Top 15 capsular polysaccharide genes which are differentially present in commensal compared with extra-intestinal strains.
- F)** KEGG categories of genes core to a number of phylogroups (x-axis).



### **Supplemental Figure 3. Polysaccharide operon structures among *B. fragilis* strains**

PSB-H operon structure per all high-quality isolates in the *B. fragilis* pangenome (n=262). Genes are annotated with gene names, if annotated by bakta. Colored by COG category, annotated with information on select strains profiled throughout the study.

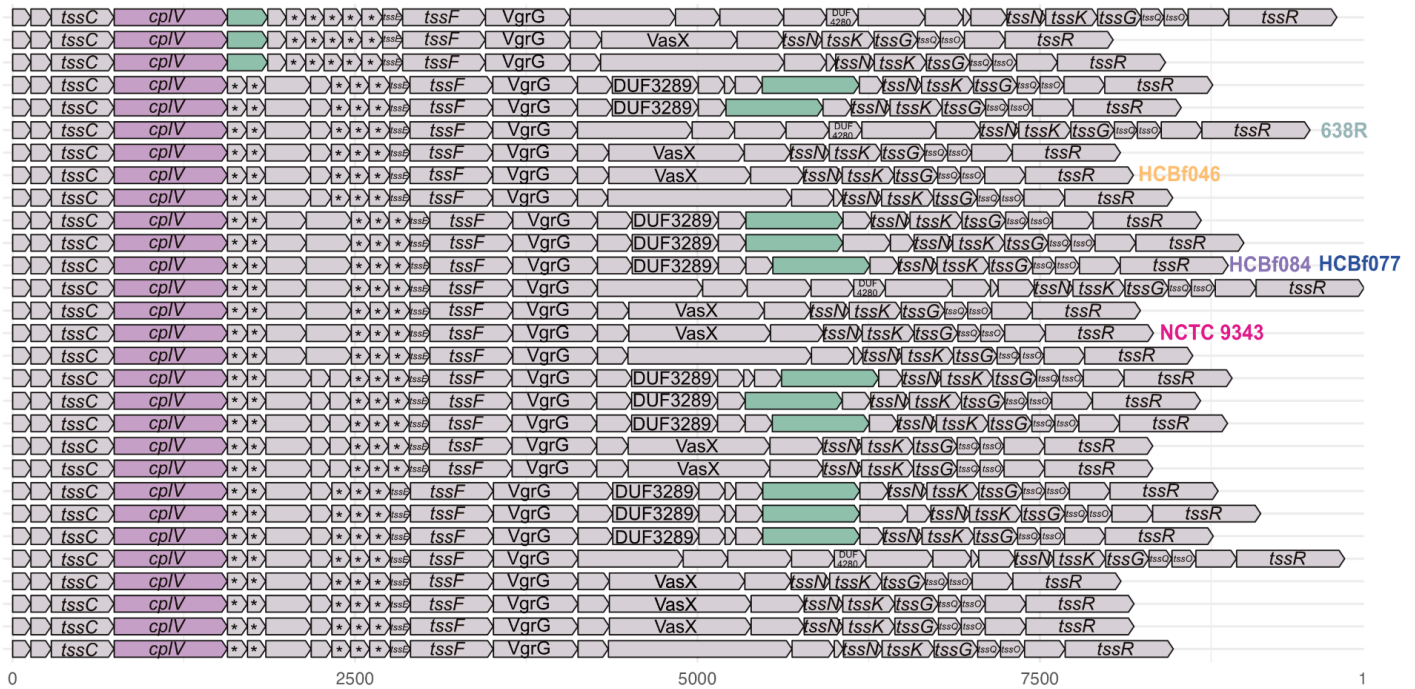

#### Supplemental Figure 4. T6SSiii GA3 operon structures present in *B. fragilis* isolates

T6SSiii GA3 operon structure per all isolates in the *B. fragilis* pangenome (n=813), genes annotated with gene names if annotated by bakta, colored by COG category (grey, unknown; green, cell wall/membrane/envelope biogenesis; pink, replication and repair), annotated with information on phylogroup composition per operon.

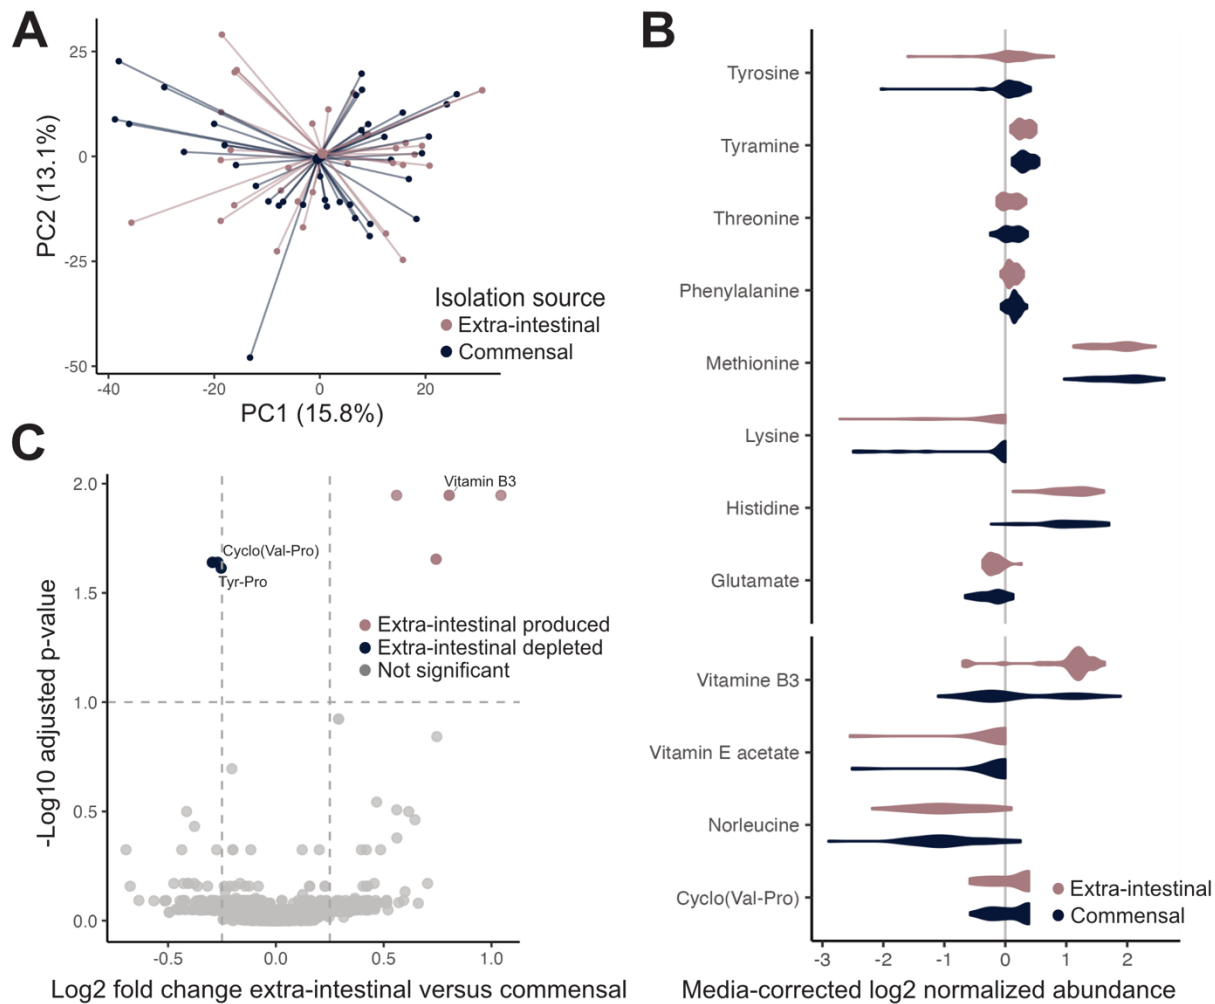

### Supplemental Figure 5. Metabolic features among commensal and extra-intestinal *B. fragilis*

**A)** PCA plot of media-corrected normalized abundances of strains (total, n=69; extra-intestinal=38; commensal=31) connected to the centroid of each group, colored by isolation source, (PERMANOVA, p=0.992).

**B)** Metabolite production of annotated metabolites across *B. fragilis* strains normalized against the media control (n=73), comparing extra-intestinal (n=33) and commensal (n=40) strains.

**C)** Volcano plot of differentially abundant metabolites of extra-intestinal (n=33) compared with commensal (n=40) strains. P-values on the y-axis are from a Wilcoxon rank-sum test comparing the average abundance of metabolites across strains versus a media control (dashed lines at Benjamini-Hochberg adjusted p-value  $\leq 0.1$  and log<sub>2</sub>-fold change  $\geq 0.25$ ).

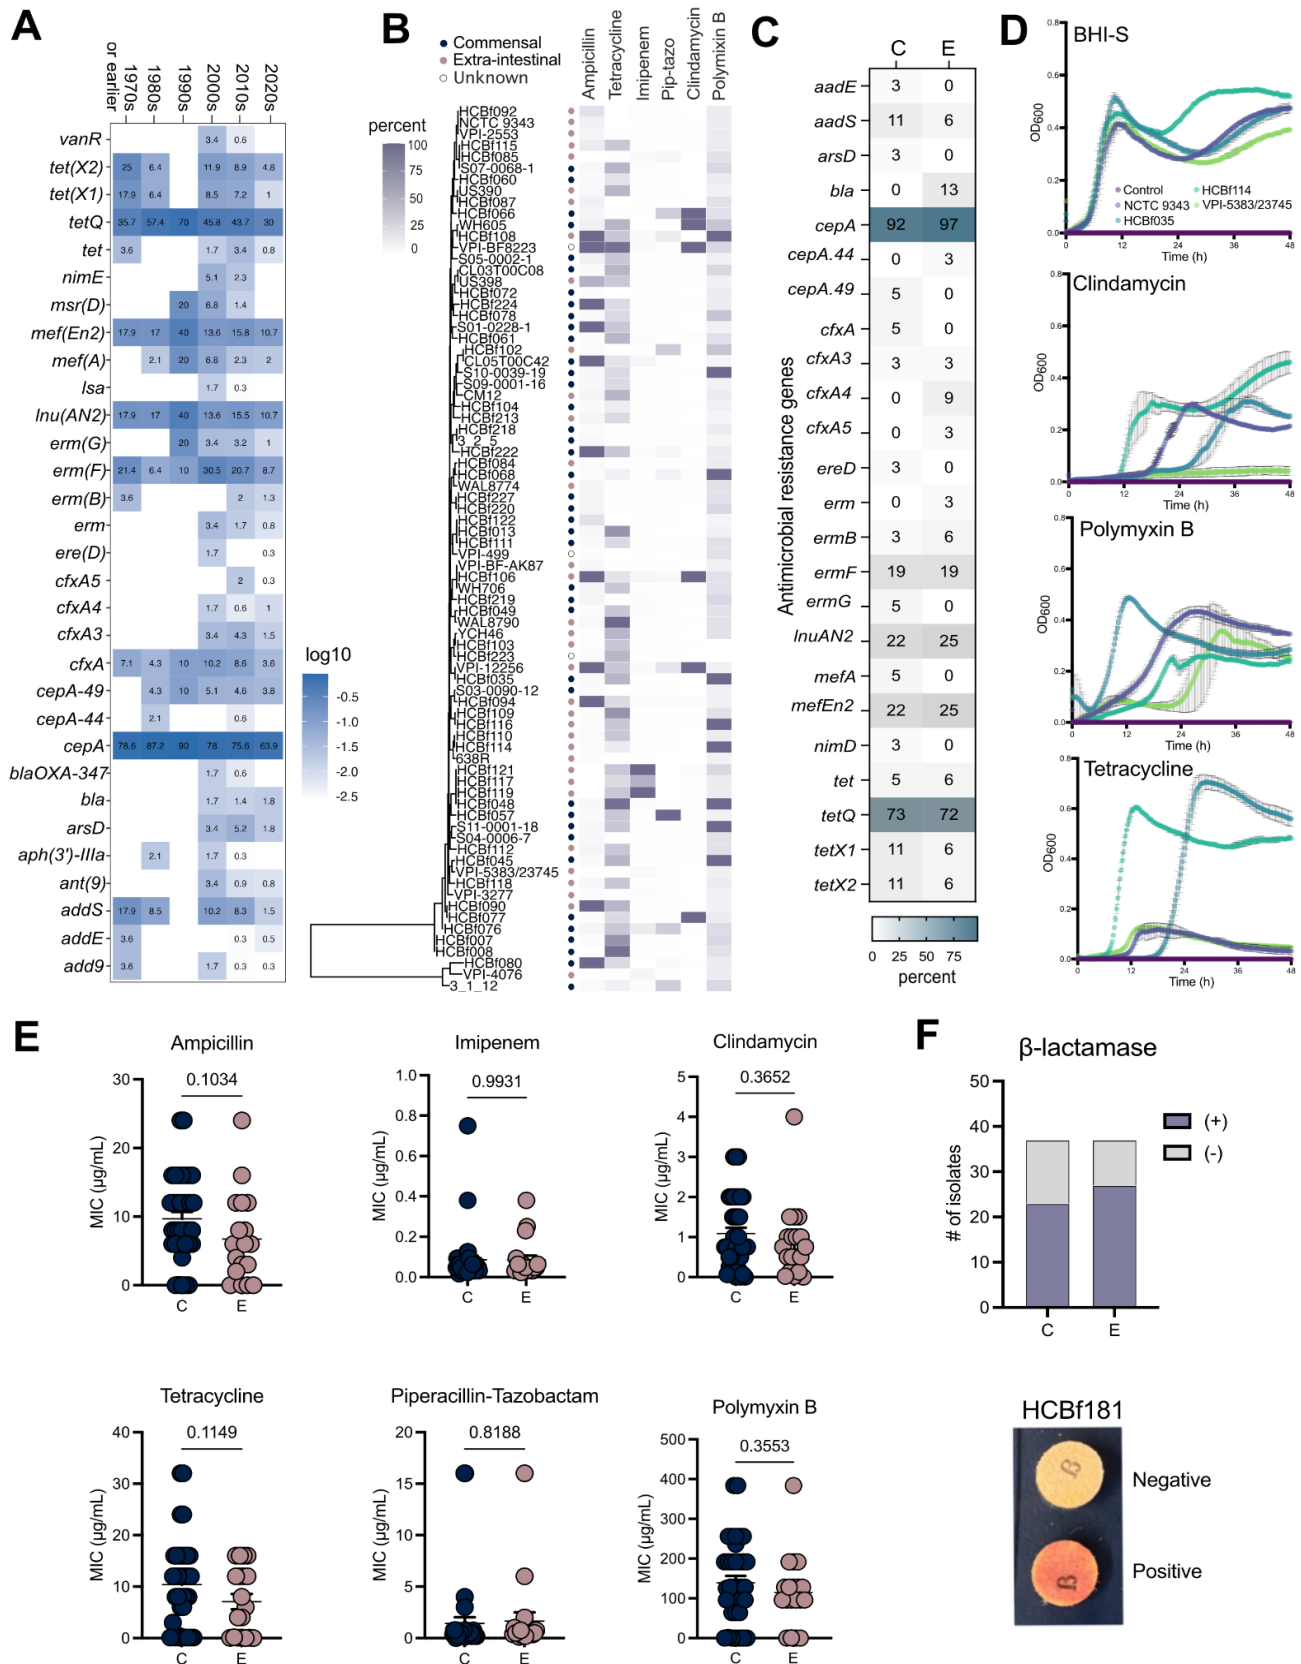

**Supplemental Figure 6. Antimicrobial resistance profile among commensal and pathogenic *B. fragilis***

**A**) The percentage of antimicrobial gene presence-absence, grouping *B. fragilis* isolates by decade of isolation (1970s or earlier, n=28; 1980s, n=47; 1990s, n=10; 2000s, n=348; 2010s, n=393; 2020s, n=393).



- B)** Phylogenetic tree of *B. fragilis* strains used in antimicrobial resistance testing with proportion of resistance to ampicillin, tetracycline, imipenem, piperacillin-tazobactam (pip-tazo), clindamycin and polymyxin B.
- C)** Percent of antimicrobial resistance gene distribution among *B. fragilis* strains (commensal, n=37; extra-intestinal, n=32). Unknowns were excluded from the analysis.
- D)** Growth rate of representative strains in no antibiotic media control, clindamycin (0.03125 µg/mL), polymyxin B (400 µg/mL), and tetracycline (0.1875 µg/mL).
- E)** Comparison of antimicrobial minimal inhibitory concentration (MIC, µg/mL) among commensal (C) and extra-intestinal (E) *B. fragilis* strains. Unknowns were excluded from the analysis. Unpaired t-test with Welch's correction.
- F)** Beta-lactamase production among commensal (C) and extra-intestinal (E) *B. fragilis* strains and representative positive reaction for beta-lactamase production (n=37 per group). p=0.457 from a Fisher's exact test.
